Books Received (*Continued*)

| Title & Edition                                     | Author/Editor                                    | Publisher                                      |       |         |
|-----------------------------------------------------|--------------------------------------------------|------------------------------------------------|-------|---------|
|                                                     |                                                  | Address, Name, Year                            | Pages | Price   |
| Pharmacologie Cardiovasculaire Pulmonaire et Renale | G. J. Faucon                                     | Paris<br>Doin Editeurs<br>1980                 | 694   | PNS     |
| Sedation, Book I                                    | Harold L. Hamburg                                | Chicago<br>Quintessence Publishing Co.<br>1980 | 197   | PNS     |
| Systolic Time Intervals                             | W. F. List<br>J. S. Gravenstein<br>D. H. Spodick | New York<br>Springer-Verlag<br>1980            | 303   | \$31.90 |

**Erratum**

Two errors appeared in the article, "Pseudochoolinesterase Levels and Rates of Chloroprocaine Hydrolysis in Patients Receiving Adequate Doses of Phospholine Iodide" (ANESTHESIOLOGY 52:434-435, 1980). On page 434, in the Materials and Methods section, line 10 should read, "pH 7.6, as buffer. Activity is expressed as nano- . . ." In table 1, the significance of differences between means for chloroprocaine should read " $0.01 < P < 0.05$ " [not  $0.01 > P > 0.05$ ].
